# Supplementary material for: eMental Healthcare Technologies for Anxiety and Depression in Childhood and Adolescence: Systematic Review of Studies Reporting Implementation Outcomes
Source: PubMed Central journal article supplement (PMC6039769; doi:10.2196/mental.9655), 2018-06-26
Supplement: mental_v5i2e48_app2.pdf [file mental_v5i2e48_app2.pdf]

Multimedia Appendix. Study Quality according to Mixed Methods Appraisal Tool (MMAT).

| <b>Qualitative studies</b>                       |                                                                                       |                                                                     |                                                               |                                                                        |                   |
|--------------------------------------------------|---------------------------------------------------------------------------------------|---------------------------------------------------------------------|---------------------------------------------------------------|------------------------------------------------------------------------|-------------------|
| <b>Author</b>                                    | <b>1.1</b>                                                                            | <b>1.2</b>                                                          | <b>1.3</b>                                                    | <b>1.4</b>                                                             | <b>MMAT score</b> |
|                                                  | Are the sources of qualitative data relevant to address the question?                 | Is the process for analyzing data relevant to address the question? | Is consideration given to how findings relate to the context? | Is consideration given to how findings relate to researcher influence? |                   |
| Lenhard et al. [80]                              | <input type="checkbox"/>                                                              | <input type="checkbox"/>                                            | <input type="checkbox"/>                                      | <input type="checkbox"/>                                               | 100               |
| <b>Quantitative randomized controlled trials</b> |                                                                                       |                                                                     |                                                               |                                                                        |                   |
| <b>Author</b>                                    | <b>2.1</b>                                                                            | <b>2.2</b>                                                          | <b>2.3</b>                                                    | <b>2.4</b>                                                             | <b>MMAT score</b> |
|                                                  | Is there a clear description of the randomization or appropriate sequence generation? | Is there a clear description of the allocation concealment?         | Are there complete outcome data (80% or above)?               | Is there low withdrawal/drop-out (below 20%)?                          |                   |
| Donovan et al. [46]                              | <input type="checkbox"/>                                                              | <input type="checkbox"/>                                            | <input type="checkbox"/>                                      | <input type="checkbox"/>                                               | 100               |
| Anderson et al. [47]                             | <input type="checkbox"/>                                                              | <input type="checkbox"/>                                            | <input type="checkbox"/>                                      | <input type="checkbox"/>                                               | 100               |
| Merry et al. [71]                                | <input type="checkbox"/>                                                              | <input type="checkbox"/>                                            | <input type="checkbox"/>                                      | <input type="checkbox"/>                                               | 100               |
| Spence et al. [48]                               | <input type="checkbox"/>                                                              | <input type="checkbox"/>                                            | <input type="checkbox"/>                                      | <input type="checkbox"/>                                               | 100               |
| March et al. [49]                                | <input type="checkbox"/>                                                              | <input type="checkbox"/>                                            | <input type="checkbox"/>                                      | <input type="checkbox"/>                                               | 100               |
| Van Voorhees et al. [63]                         | <input type="checkbox"/>                                                              | <input type="checkbox"/>                                            | <input type="checkbox"/>                                      | <input type="checkbox"/>                                               | 100               |
| Van Voorhees et al. [64]                         | <input type="checkbox"/>                                                              | <input type="checkbox"/>                                            | <input type="checkbox"/>                                      | <input type="checkbox"/>                                               | 100               |
| Van Voorhees et al. [65]                         | <input type="checkbox"/>                                                              | <input type="checkbox"/>                                            | <input type="checkbox"/>                                      | <input type="checkbox"/>                                               | 100               |
| Spence et al. [50]                               | <input type="checkbox"/>                                                              | <input type="checkbox"/>                                            | <input type="checkbox"/>                                      | <input type="checkbox"/>                                               | 100               |
| Morgan et al. [36]                               | <input type="checkbox"/>                                                              | x                                                                   | <input type="checkbox"/>                                      | <input type="checkbox"/>                                               | 75                |
| Wuthrich et al. [53]                             | <input type="checkbox"/>                                                              | x                                                                   | <input type="checkbox"/>                                      | <input type="checkbox"/>                                               | 75                |
| Khanna et al.                                    | <input type="checkbox"/>                                                              | x                                                                   | <input type="checkbox"/>                                      | <input type="checkbox"/>                                               | 75                |

|                                           |                                                                     |                                                                               |                                                                                                                                         |                                                                                                                                                                                                                |                   |
|-------------------------------------------|---------------------------------------------------------------------|-------------------------------------------------------------------------------|-----------------------------------------------------------------------------------------------------------------------------------------|----------------------------------------------------------------------------------------------------------------------------------------------------------------------------------------------------------------|-------------------|
| [38]                                      |                                                                     |                                                                               |                                                                                                                                         |                                                                                                                                                                                                                |                   |
| Reuland et al. [43]                       | x                                                                   | x                                                                             | ☐                                                                                                                                       | ☐                                                                                                                                                                                                              | 50                |
| Tillfors et al. [54]                      | x                                                                   | x                                                                             | ☐                                                                                                                                       | ☐                                                                                                                                                                                                              | 50                |
| Vigerland et al. [42]                     | x                                                                   | x                                                                             | ☐                                                                                                                                       | ☐                                                                                                                                                                                                              | 50                |
| Kobak et al. [61]                         | x                                                                   | x                                                                             | ☐                                                                                                                                       | ☐                                                                                                                                                                                                              | 50                |
| Gladstone et al. [69]                     | x                                                                   | x                                                                             | ☐                                                                                                                                       | ☐                                                                                                                                                                                                              | 50                |
| Hoek et al. [76]                          | ☐                                                                   | ☐                                                                             | x                                                                                                                                       | x                                                                                                                                                                                                              | 50                |
| Storch et al. [41]                        | ☐                                                                   | x                                                                             | ☐                                                                                                                                       | x                                                                                                                                                                                                              | 25                |
| Salloum et al. [40]                       | x                                                                   | ☐                                                                             | x                                                                                                                                       | x                                                                                                                                                                                                              | 25                |
| Eisen et al. [70]                         | x                                                                   | x                                                                             | o                                                                                                                                       | o                                                                                                                                                                                                              | 0                 |
| <b>Quantitative non-randomized trials</b> |                                                                     |                                                                               |                                                                                                                                         |                                                                                                                                                                                                                |                   |
| <b>Author</b>                             | <b>3.1</b>                                                          | <b>3.2</b>                                                                    | <b>3.3</b>                                                                                                                              | <b>3.4</b>                                                                                                                                                                                                     | <b>MMAT score</b> |
|                                           | Are participants recruited in a way that minimizes selection bias?  | Are measurements appropriate regarding the exposure / intervention, outcomes? | In the groups being compared, are the participants comparable, or do researchers take into account the difference between these groups? | Are there complete outcome data (80% or above), and, when applicable, an acceptable response rate (60% or above), or an acceptable follow-up rate for cohort studies (depending on the duration of follow-up)? |                   |
| Sapru et al. [73]                         | x                                                                   | ☐                                                                             | ☐                                                                                                                                       | x                                                                                                                                                                                                              | 50                |
| <b>Quantitative descriptive studies</b>   |                                                                     |                                                                               |                                                                                                                                         |                                                                                                                                                                                                                |                   |
| <b>Author</b>                             | <b>4.1</b>                                                          | <b>4.2</b>                                                                    | <b>4.3</b>                                                                                                                              | <b>4.4</b>                                                                                                                                                                                                     | <b>MMAT score</b> |
|                                           | Is the sampling strategy relevant to address the research question? | Is the sample representative of the population under study?                   | Are measurements appropriate?                                                                                                           | Is there an acceptable response rate (60% or above)?                                                                                                                                                           |                   |
| Carrasco et al. [81]                      | ☐                                                                   | ☐                                                                             | ☐                                                                                                                                       | ☐                                                                                                                                                                                                              | 100               |
| Rice et al. [59]                          | ☐                                                                   | ☐                                                                             | ☐                                                                                                                                       | ☐                                                                                                                                                                                                              | 100               |
| Simmons et al. [56]                       | ☐                                                                   | ☐                                                                             | ☐                                                                                                                                       | ☐                                                                                                                                                                                                              | 100               |
| Lenhard et al.                            | ☐                                                                   | ☐                                                                             | ☐                                                                                                                                       | ☐                                                                                                                                                                                                              | 100               |

|                          |                          |                          |                          |                          |                          |                          |                          |                          |                          |                          |                          |                          |                          |                          |                          |     |
|--------------------------|--------------------------|--------------------------|--------------------------|--------------------------|--------------------------|--------------------------|--------------------------|--------------------------|--------------------------|--------------------------|--------------------------|--------------------------|--------------------------|--------------------------|--------------------------|-----|
| [78]                     |                          |                          |                          |                          |                          |                          |                          |                          |                          |                          |                          |                          |                          |                          |                          |     |
| Sarver et al. [55]       | <input type="checkbox"/> | <input type="checkbox"/> | <input type="checkbox"/> | <input type="checkbox"/> | <input type="checkbox"/> | <input type="checkbox"/> | <input type="checkbox"/> | <input type="checkbox"/> | <input type="checkbox"/> | <input type="checkbox"/> | <input type="checkbox"/> | <input type="checkbox"/> | <input type="checkbox"/> | <input type="checkbox"/> | <input type="checkbox"/> | 100 |
| Bobier et al. [75]       | <input type="checkbox"/> | <input type="checkbox"/> | <input type="checkbox"/> | <input type="checkbox"/> | <input type="checkbox"/> | <input type="checkbox"/> | <input type="checkbox"/> | <input type="checkbox"/> | <input type="checkbox"/> | <input type="checkbox"/> | <input type="checkbox"/> | <input type="checkbox"/> | <input type="checkbox"/> | <input type="checkbox"/> | <input type="checkbox"/> | 100 |
| Crawford et al. [37]     | <input type="checkbox"/> | <input type="checkbox"/> | <input type="checkbox"/> | <input type="checkbox"/> | <input type="checkbox"/> | <input type="checkbox"/> | <input type="checkbox"/> | <input type="checkbox"/> | <input type="checkbox"/> | <input type="checkbox"/> | <input type="checkbox"/> | <input type="checkbox"/> | <input type="checkbox"/> | <input type="checkbox"/> | <input type="checkbox"/> | 100 |
| Ruby et al. [67]         | <input type="checkbox"/> | <input type="checkbox"/> | <input type="checkbox"/> | <input type="checkbox"/> | <input type="checkbox"/> | <input type="checkbox"/> | <input type="checkbox"/> | <input type="checkbox"/> | <input type="checkbox"/> | <input type="checkbox"/> | <input type="checkbox"/> | <input type="checkbox"/> | <input type="checkbox"/> | <input type="checkbox"/> | <input type="checkbox"/> | 100 |
| Vigerland et al. [79]    | <input type="checkbox"/> | <input type="checkbox"/> | <input type="checkbox"/> | <input type="checkbox"/> | <input type="checkbox"/> | <input type="checkbox"/> | <input type="checkbox"/> | <input type="checkbox"/> | <input type="checkbox"/> | <input type="checkbox"/> | <input type="checkbox"/> | <input type="checkbox"/> | <input type="checkbox"/> | <input type="checkbox"/> | <input type="checkbox"/> | 100 |
| Van Voorhees et al. [66] | <input type="checkbox"/> | <input type="checkbox"/> | <input type="checkbox"/> | <input type="checkbox"/> | <input type="checkbox"/> | <input type="checkbox"/> | <input type="checkbox"/> | <input type="checkbox"/> | <input type="checkbox"/> | <input type="checkbox"/> | <input type="checkbox"/> | <input type="checkbox"/> | <input type="checkbox"/> | <input type="checkbox"/> | <input type="checkbox"/> | 100 |
| Ercan et al. [77]        | <input type="checkbox"/> | <input type="checkbox"/> | <input type="checkbox"/> | <input type="checkbox"/> | <input type="checkbox"/> | <input type="checkbox"/> | <input type="checkbox"/> | <input type="checkbox"/> | <input type="checkbox"/> | <input type="checkbox"/> | <input type="checkbox"/> | <input type="checkbox"/> | <input type="checkbox"/> | <input type="checkbox"/> | <input type="checkbox"/> | 100 |
| Cunningham et al. [52]   | <input type="checkbox"/> | <input type="checkbox"/> | <input type="checkbox"/> | <input type="checkbox"/> | <input type="checkbox"/> | <input type="checkbox"/> | <input type="checkbox"/> | <input type="checkbox"/> | <input type="checkbox"/> | <input type="checkbox"/> | <input type="checkbox"/> | <input type="checkbox"/> | <input type="checkbox"/> | <input type="checkbox"/> | <input type="checkbox"/> | 100 |
| Brezinka et al. [51]     | <input type="checkbox"/> | <input type="checkbox"/> | <input type="checkbox"/> | <input type="checkbox"/> | <input type="checkbox"/> | <input type="checkbox"/> | <input type="checkbox"/> | <input type="checkbox"/> | <input type="checkbox"/> | <input type="checkbox"/> | <input type="checkbox"/> | <input type="checkbox"/> | <input type="checkbox"/> | <input type="checkbox"/> | <input type="checkbox"/> | 75  |
| Brezinka et al. [74]     | <input type="checkbox"/> | <input type="checkbox"/> | <input type="checkbox"/> | <input type="checkbox"/> | <input type="checkbox"/> | <input type="checkbox"/> | <input type="checkbox"/> | <input type="checkbox"/> | <input type="checkbox"/> | <input type="checkbox"/> | <input type="checkbox"/> | <input type="checkbox"/> | <input type="checkbox"/> | <input type="checkbox"/> | <input type="checkbox"/> | 75  |
| Pramana et al. [45]      | <input type="checkbox"/> | <input type="checkbox"/> | <input type="checkbox"/> | <input type="checkbox"/> | <input type="checkbox"/> | <input type="checkbox"/> | <input type="checkbox"/> | <input type="checkbox"/> | <input type="checkbox"/> | <input type="checkbox"/> | <input type="checkbox"/> | <input type="checkbox"/> | <input type="checkbox"/> | <input type="checkbox"/> | <input type="checkbox"/> | 50  |
| Hetrick et al. [58]      | <input type="checkbox"/> | <input type="checkbox"/> | <input type="checkbox"/> | <input type="checkbox"/> | <input type="checkbox"/> | <input type="checkbox"/> | <input type="checkbox"/> | <input type="checkbox"/> | <input type="checkbox"/> | <input type="checkbox"/> | <input type="checkbox"/> | <input type="checkbox"/> | <input type="checkbox"/> | <input type="checkbox"/> | <input type="checkbox"/> | 50  |

| Mixed methods studies |                                                                       |                                                                     |                                                               |                                                                        |                                                                    |                                                                               |                                                                                                                                         |                                                                                                                                                                                    |                                                                     |                                                             |                               |                                                      |                                                 |                                                                        |                                                                                                       |            |
|-----------------------|-----------------------------------------------------------------------|---------------------------------------------------------------------|---------------------------------------------------------------|------------------------------------------------------------------------|--------------------------------------------------------------------|-------------------------------------------------------------------------------|-----------------------------------------------------------------------------------------------------------------------------------------|------------------------------------------------------------------------------------------------------------------------------------------------------------------------------------|---------------------------------------------------------------------|-------------------------------------------------------------|-------------------------------|------------------------------------------------------|-------------------------------------------------|------------------------------------------------------------------------|-------------------------------------------------------------------------------------------------------|------------|
| Author                | 1.1                                                                   | 1.2                                                                 | 1.3                                                           | 1.4                                                                    | 3.1                                                                | 3.2                                                                           | 3.3                                                                                                                                     | 3.4                                                                                                                                                                                | 4.1                                                                 | 4.2                                                         | 4.3                           | 4.4                                                  | 5.1                                             | 5.2                                                                    | 5.3                                                                                                   | MMAT score |
|                       | Are the sources of qualitative data relevant to address the question? | Is the process for analyzing data relevant to address the question? | Is consideration given to how findings relate to the context? | Is consideration given to how findings relate to researcher influence? | Are participants recruited in a way that minimizes selection bias? | Are measurements appropriate regarding the exposure / intervention, outcomes? | In the groups being compared, are the participants comparable, or do researchers take into account the difference between these groups? | Are there complete outcome data (80% or above), and, when applicable, an acceptable response rate (60% or above), or an acceptable follow-up rate for cohort studies (depending on | Is the sampling strategy relevant to address the research question? | Is the sample representative of the population under study? | Are measurements appropriate? | Is there an acceptable response rate (60% or above)? | Is the design relevant to address the question? | Is the integration of data / results relevant to address the question? | Is consideration given to the limitations associated with this integration in a triangulation design? |            |

|                        |   |   |   |   |  |  |  | the duration of follow-up? |   |   |   |   |   |   |   |     |
|------------------------|---|---|---|---|--|--|--|----------------------------|---|---|---|---|---|---|---|-----|
| Hetrick et al. [57]    | ☐ | ☐ | x | ☐ |  |  |  |                            | ☐ | ☐ | ☐ | ☐ | ☐ | ☐ | ☐ | 100 |
| Salloum et al. [39]    | ☐ | ☐ | ☐ | x |  |  |  |                            | ☐ | ☐ | ☐ | ☐ | ☐ | ☐ | x | 75  |
| Cunningham et al. [44] | ☐ | ☐ | ☐ | ☐ |  |  |  |                            | ☐ | ☐ | ☐ | ☐ | ☐ | ☐ | x | 75  |
| Ranney et at. [60]     | ☐ | ☐ | ☐ | x |  |  |  |                            | ☐ | ☐ | ☐ | ☐ | ☐ | ☐ | ☐ | 75  |
| Iloabachie et al. [68] | ☐ | ☐ | ☐ | ☐ |  |  |  |                            | ☐ | ☐ | ☐ | x | ☐ | ☐ | ☐ | 75  |
| Demaso et al. [72]     | ☐ | ☐ | x | x |  |  |  |                            | ☐ | ☐ | ☐ | x | ☐ | ☐ | x | 50  |
| Davidson et al. [62]   | ☐ | ☐ | x | x |  |  |  |                            | x | x | x | ☐ | ☐ | ☐ | x | 25  |

☐=yes; x=no; o=can't tell; RCT: Randomized Controlled Trial; MMAT=Mixed Methods Appraisal Tool; All studies undergoing quality assessment passed the screening questions: 1) Clear research question? 2) Do collected data address the question?
